# Supplementary material for: Growth of water hyacinth biomass and its impact on the floristic composition of aquatic plants in a wetland ecosystem of the Brahmaputra floodplain of Assam, India
Source: PeerJ. 2023 Feb 3;11:e14811. doi: 10.7717/peerj.14811 (PMC9901310; doi:10.7717/peerj.14811)
Supplement: Supplemental Information 5 [file peerj-11-14811-s005.xlsx]

## Sheet: Sheet1
			Raw Data of Correlation Table (Table 7)
			Seasons	Biomass (in kg)	Shannon Index	r Value
			Pre monsson (March)	3.44	3.29	-0.92
			Monsoon (June)	11	3.12	-0.97
			Post monsson (Sept)	40.8	2.97	0.99
			Winter (December)	13.15	3.14	-0.97
